# Supplementary material for: Endogenous Controls for the Evaluation of Osteoarthritis-Related miRNAs in Extracellular Vesicles from Bone-Marrow-Derived Mesenchymal Stromal Cells and the Impact of Osteoarthritis Synovial Fluid
Source: MDPI journal article supplement (doi:10.3390/biom12020316), 2022-02-16
Supplement: s1 [file s1]

Table S1: C<sub>RT</sub> values of positively amplified EV-miRNA RGs and OA-related miR-193b-5p

| miRBase ID  | C <sub>RT</sub> |
|-------------|-----------------|-----------------|-----------------|-----------------|-----------------|-----------------|
|             | B11C            | B15C            | B16C            | B11L            | B15L            | B16L            |
| let-7a-5p   | 18.88           | 20.87           | 21.84           | 19.79           | 20.83           | 19.90           |
| miR-16-5p   | 16.29           | 15.87           | 15.84           | 16.41           | 16.31           | 16.19           |
| miR-23a-3p  | 22.09           | 22.09           | 22.25           | 21.44           | 21.66           | 22.31           |
| miR-24-3p   | 12.49           | 12.07           | 11.99           | 12.51           | 12.16           | 12.20           |
| miR-26a-5p  | 20.86           | 19.93           | 20.07           | 20.57           | 20.51           | 19.94           |
| miR-34a-5p  | 15.75           | 17.06           | 19.58           | 19.19           | 18.60           | 17.84           |
| miR-103a-3p | 25.43           | 23.93           | 23.56           | 23.84           | 24.84           | 23.17           |
| miR-221-3p  | 18.39           | 17.01           | 16.85           | 16.83           | 16.77           | 16.86           |
| miR-423-5p  | 22.12           | 21.83           | 22.26           | 21.89           | 21.23           | 22.01           |
| miR-425-5p  | 19.44           | 19.55           | 19.57           | 18.94           | 19.84           | 19.93           |
| miR-660-5p  | 20.83           | 21.13           | 20.96           | 21.37           | 20.86           | 21.36           |
| U6 snRNA    | 14.83           | 14.88           | 14.63           | 13.40           | 13.26           | 13.44           |
|             | B11C            | B15C            | B16C            | B11L            | B15L            | B16L            |
| miR-193b-5p | 23.26           | 23.54           | 23.55           | 21.94           | 21.87           | 22.25           |
